# Supplementary material for: AtHKT1 drives adaptation of Arabidopsis thaliana to salinity by reducing floral sodium content
Source: PLoS Genet. 2017 Oct 30;13(10):e1007086. doi: 10.1371/journal.pgen.1007086 (PMC5679648; doi:10.1371/journal.pgen.1007086)
Supplement: S1 Table — (DOCX) [file pgen.1007086.s006.docx]

| **S1 Table.** List of genes in the 100-kb candidate region between genetic markers GM635 and GM645. |  |
| --- | --- |
| | **Gene** | **Annotation** | | --- | --- | | AT4G10190 | F-box and associated interaction domains-containing protein | | AT4G10200 | TTF-type zinc finger protein with HAT dimerisation domain | | AT4G10201 | Pseudogene of AT3G21130 | | AT4G10210 | Protein of Unknown Function (DUF239) | | AT4G10220 | Protein of Unknown Function (DUF239) | | AT4G10230 | Unknown protein | | AT4G10240 | B-BOX DOMAIN PROTEIN 23 | | AT4G10250 | Columbia endomembrane-localized small heat shock protein | | AT4G10260 | pfkB-like carbohydrate kinase family protein | | AT4G10265 | Wound-responsive family protein | | AT4G10270 | Wound-responsive family protein | | AT4G10280 | RmlC-like cupins superfamily protein | | AT4G10290 | RmlC-like cupins superfamily protein | | AT4G10300 | RmlC-like cupins superfamily protein | | AT4G10310 | A sodium transporter (HKT1) expressed in xylem parenchyma cells | | AT4G10320 | tRNA synthetase class I (I, L, M and V) family protein | | AT4G10330 | Glycine-rich protein | | AT4G10340 | Photosystem II encoding the light-harvesting chlorophyll a/b binding protein | | AT4G10345 | Encodes a microRNA of unknown function | | AT4G10350 | Encode a transcription factor | | AT4G10360 | TRAM, LAG1 and CLN8 (TLC) lipid-sensing domain containing protein | | AT4G10370 | Cysteine/Histidine-rich C1 domain family protein | | AT4G10380 | NOD26-LIKE INTRINSIC PROTEIN 5;1, Boric acid channel. | | AT4G10390 | Protein kinase superfamily protein | | AT4G10400 | F-box/RNI-like/FBD-like domains-containing protein | | AT4G10410 | Leucine-rich repeat (LRR) family protein | |  |
|  |  |
